# Supplementary material for: Anti-pancreatic cancer activity of ONC212 involves the unfolded protein response (UPR) and is reduced by IGF1-R and GRP78/BIP
Source: PubMed Central journal article supplement (PMC5669847; doi:10.18632/oncotarget.20819), 2017-09-12
Supplement: oncotarget-08-81776-s001.pdf [file oncotarget-08-81776-s001.pdf]

# Anti-pancreatic cancer activity of ONC212 involves the unfolded protein response (UPR) and is reduced by IGF1-R and GRP78/BIP

## SUPPLEMENTARY MATERIALS

Supplementary Table 1: GI<sub>50</sub> doses of ONC201 and ONC212 in a panel of seven human pancreatic cancer cell lines and nine low-passage PDX pancreatic cancer cell lines

| Cell Line | GI <sub>50</sub> (μM) |        | PDX Cell line | GI <sub>50</sub> (μM) |        |
|-----------|-----------------------|--------|---------------|-----------------------|--------|
|           | ONC201                | ONC212 |               | ONC201                | ONC212 |
| BxPC3     | 12.5                  | 0.25   | PNX0001       | 70                    | 14     |
| PANC-1    | 3.125                 | 0.17   | PNX0050       | 10                    | 2      |
| Capan-2   | 6.25                  | 0.18   | PNX0027       | 1.5                   | 0.28   |
| CFPAC-1   | 7                     | 0.19   | PNX0015       | 3.75                  | 0.4    |
| Capan-1   | 3                     | 0.2    | PNX0017       | 50                    | 0.55   |
| HPAF-II   | 4.5                   | 0.15   | PNX0007       | 100                   | 16     |
| AsPC-1    | 4                     | 0.14   | PNX0016       | 3                     | 20     |
|           |                       |        | PNX0029       | 100                   | 25     |
|           |                       |        | PDSE-JH101    | 18                    | 9      |

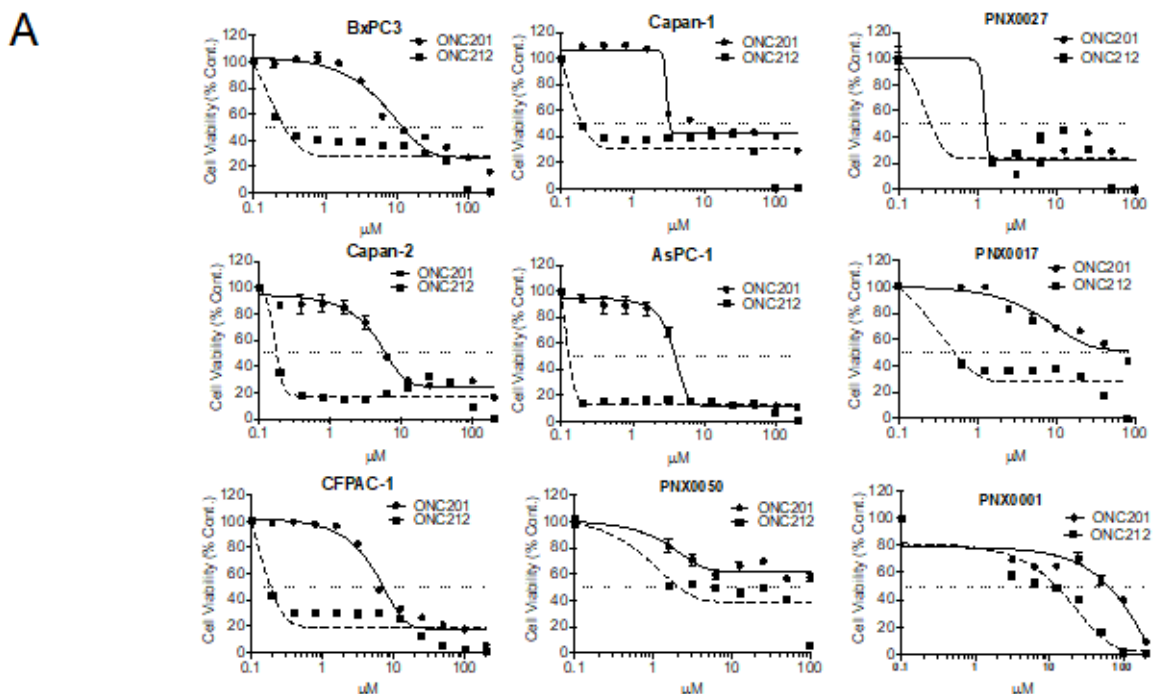

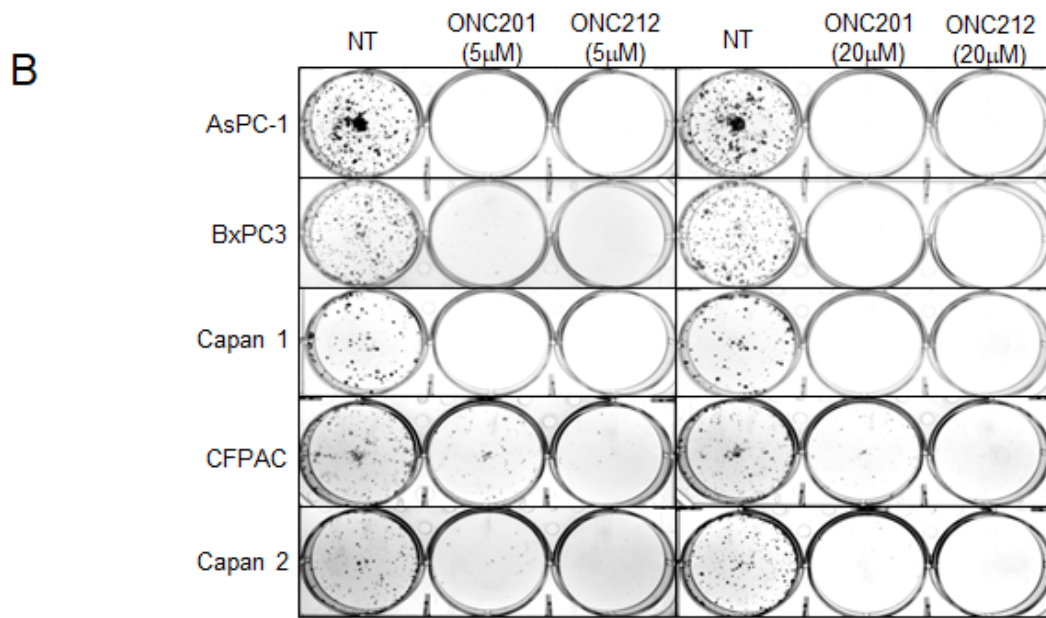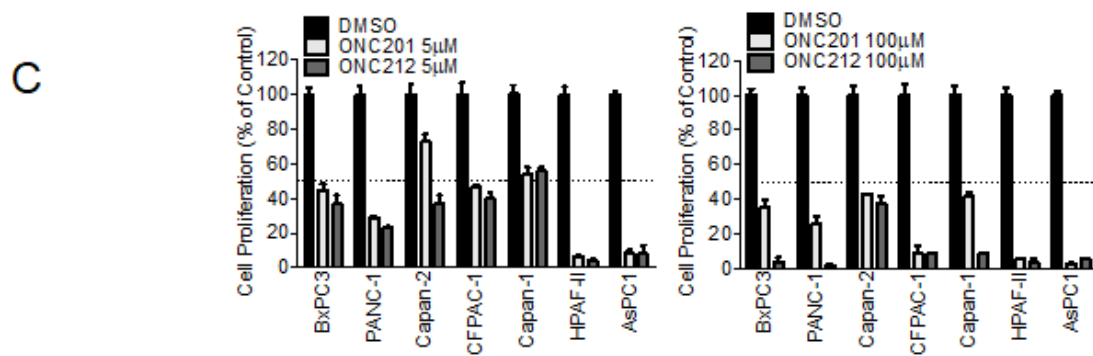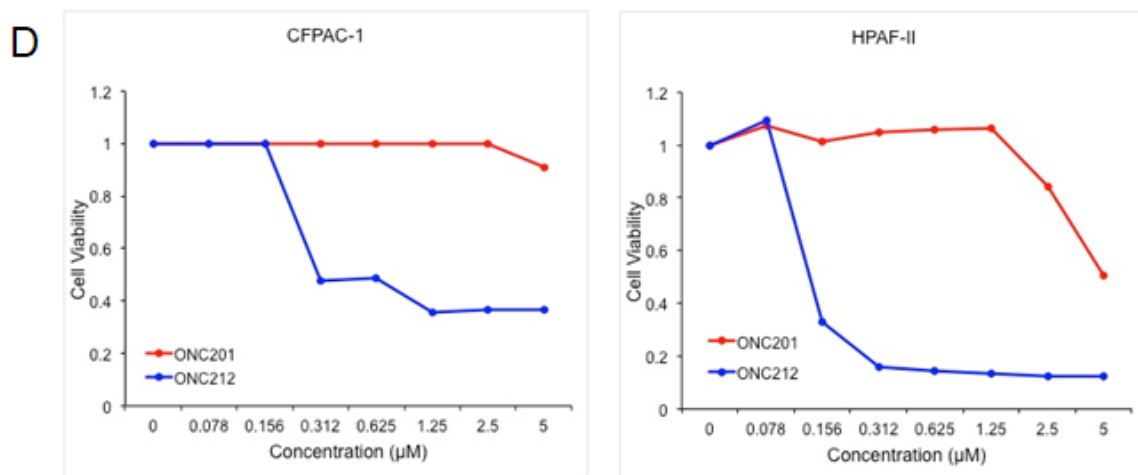

**Supplementary Figure 1:** (A) Dose-response curves for five pancreatic cancer lines (BxPC3, Capan-2, CFPAC-1, Capan-1 and AsPC-1) and PDX cell lines treated with 0-100 µM of ONC201 or ONC212. (B) Representative image of colony formation in ONC201/ONC212 treated pancreatic cancer cell lines. (C) Short-term cell proliferation measured by MTT assay 72 hours post ONC201 or ONC212. Graphs represent percent proliferation normalized to untreated control at 5 µM (Left) and 20 µM (Right) doses of ONC201 or ONC212. (D) Cell viability assays comparing ONC201 and ONC212 in selected pancreatic cancer cell lines. The data in Panel D was generated through the GDSC screen.

A

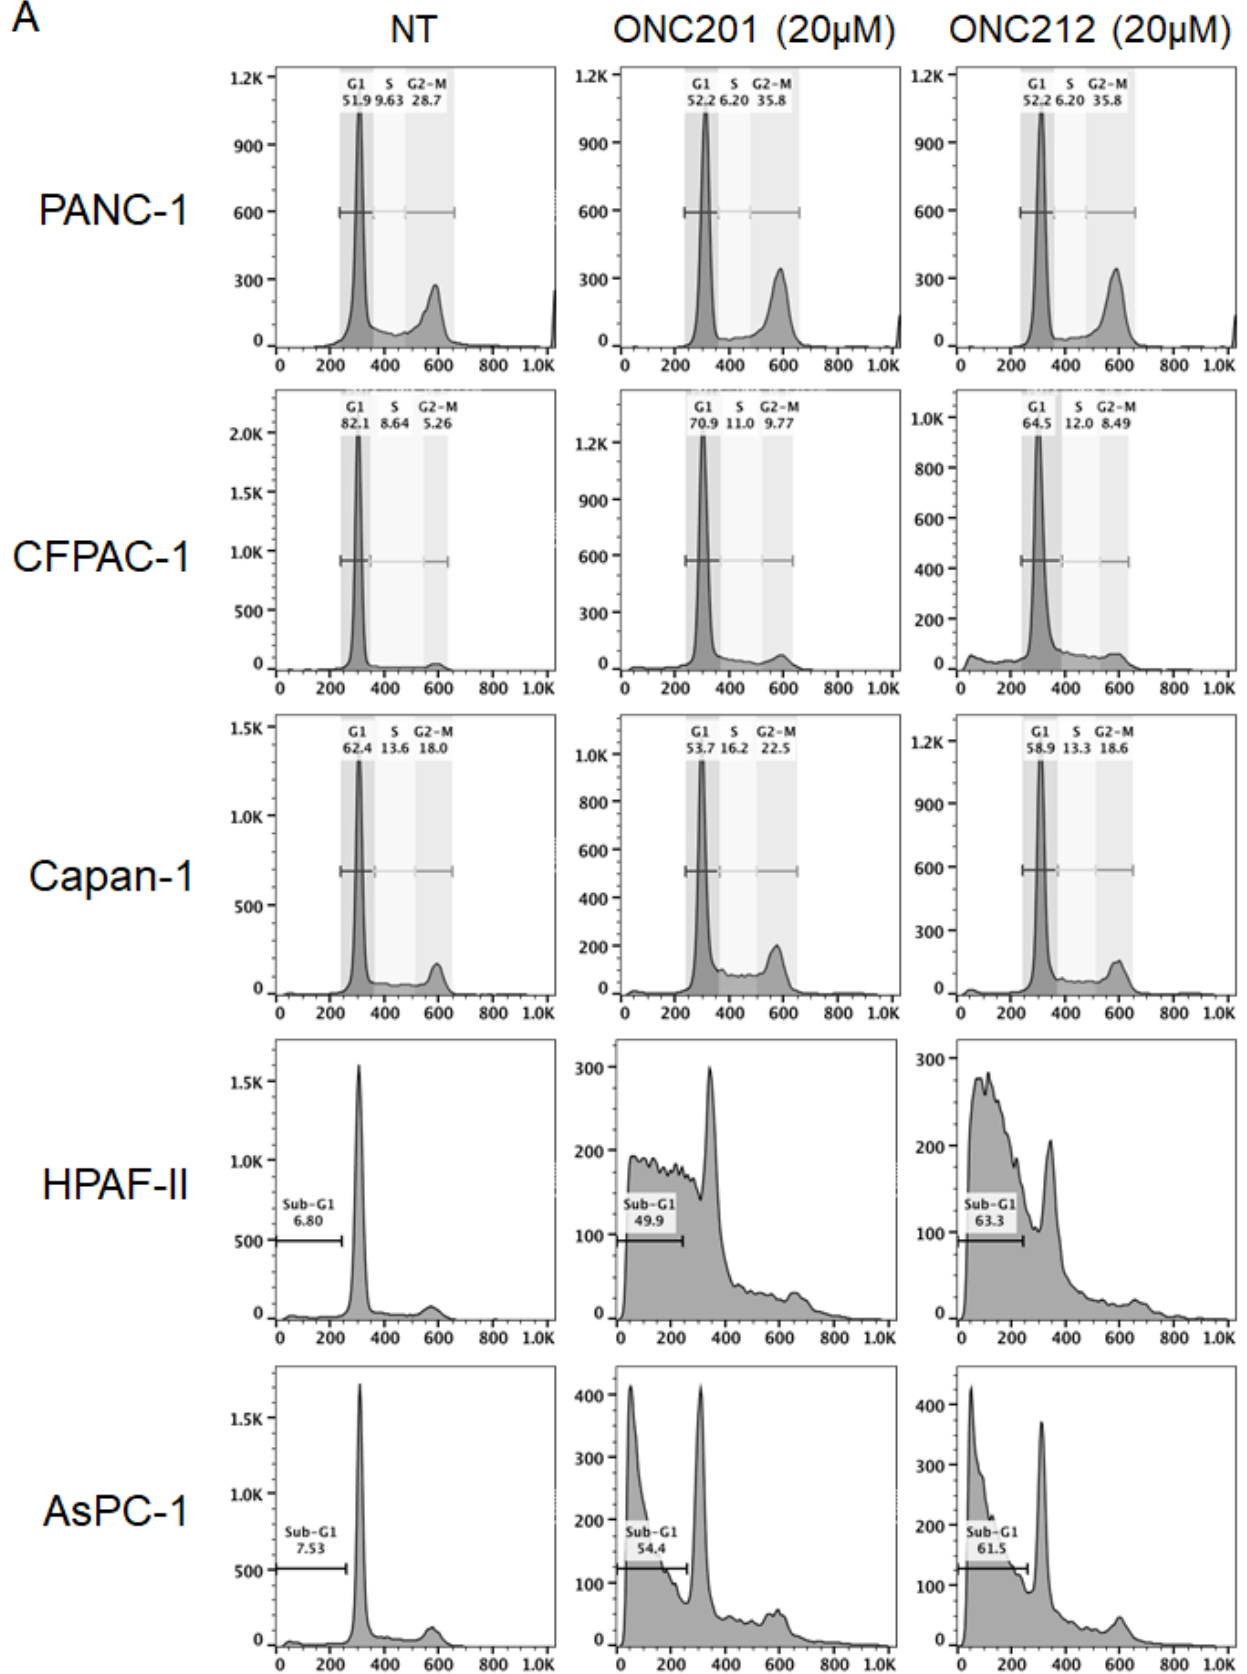

B

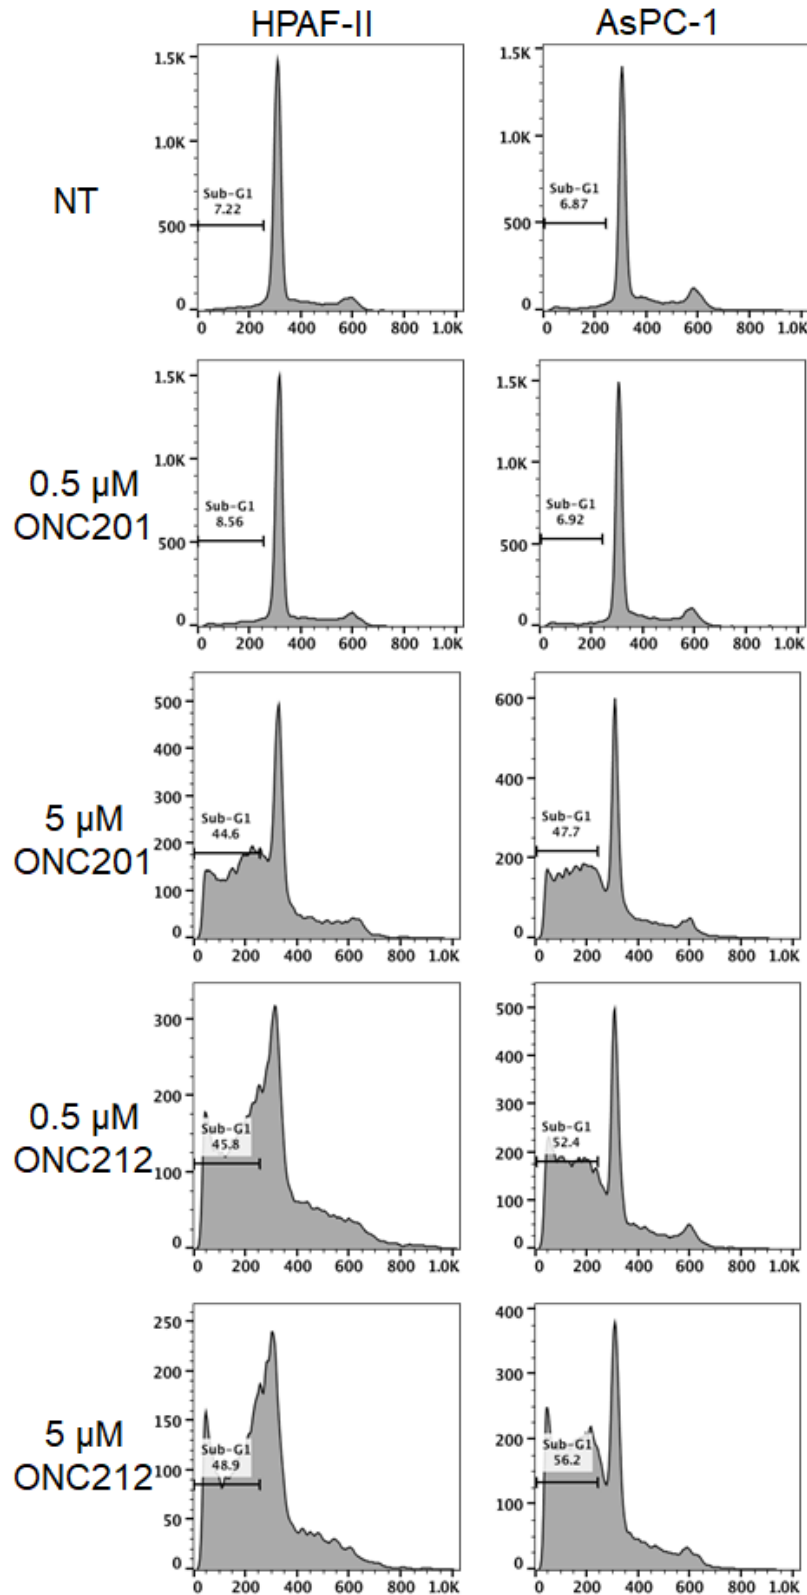

**Supplementary Figure 2:** (A) Histograms showing changes in different phases of the cell cycle in five human pancreatic cancer cell lines, 72 hours post-treatment. (B) Histograms indicating sub-G1 percentage in HPAF-II and AsPC-1 cell lines 72 hours post-treatment at the indicated doses of ONC201 or ONC212.

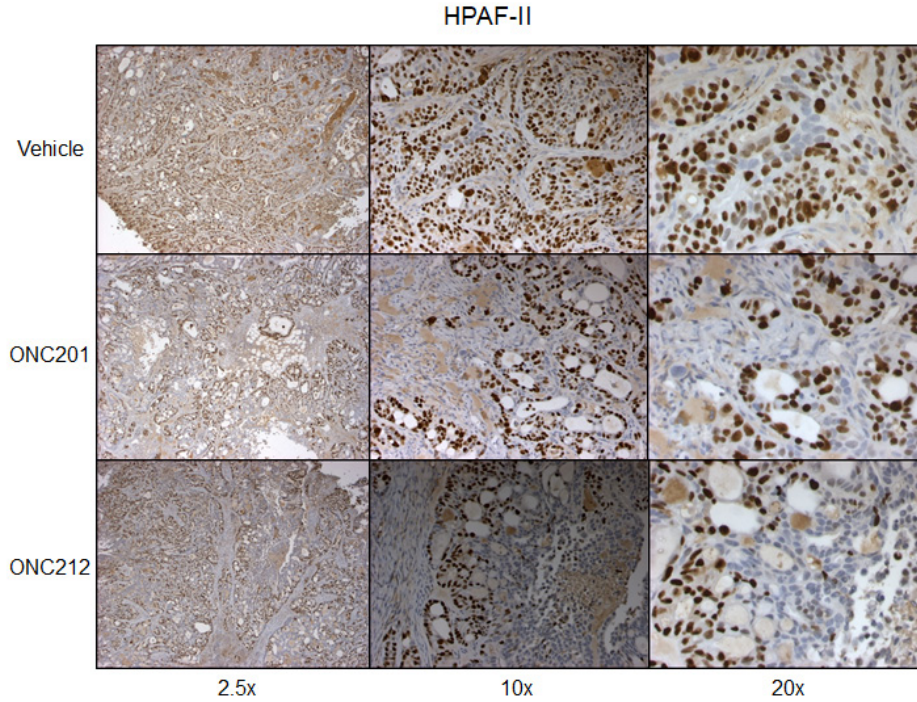

Supplementary Figure 3: Ki67 staining of HPAF-II tumor sections treated with either ONC201 or ONC212.

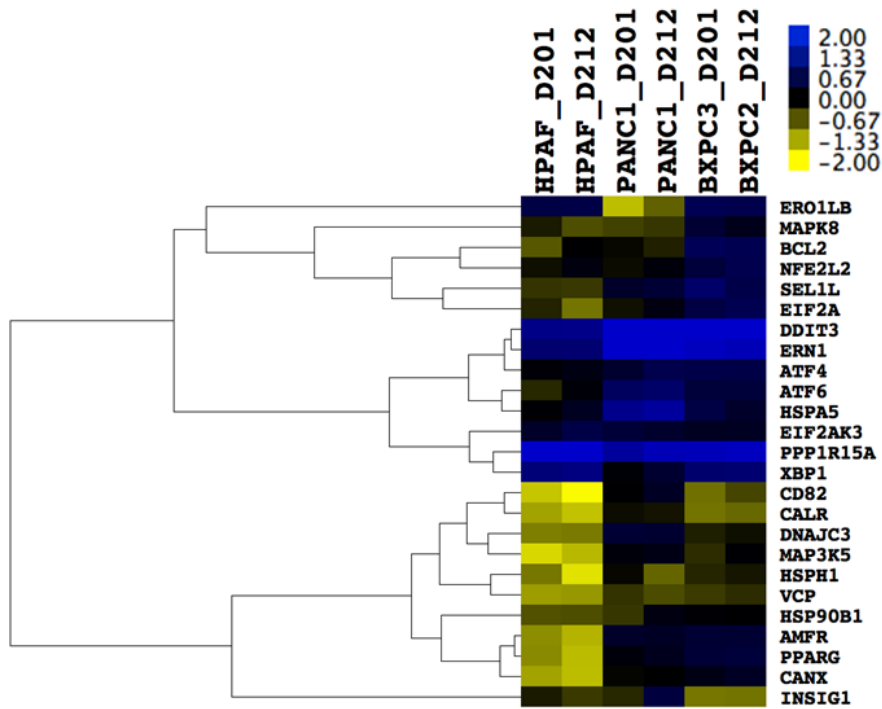

Supplementary Figure 4: Gene expression profiling by microarray analysis in HPAF-II, PANC-1 and BxPC3 cells 48 hours post treatment with 20  $\mu$ M ONC201 or ONC212 in comparison to untreated cells. Representative heat map shows expression of UPR genes relative to control for each cell line.
